# Supplementary material for: Identification of an HIV-1 BG Intersubtype Recombinant Form (CRF73_BG), Partially Related to CRF14_BG, Which Is Circulating in Portugal and Spain
Source: PLoS One. 2016 Feb 22;11(2):e0148549. doi: 10.1371/journal.pone.0148549 (PMC4765764; doi:10.1371/journal.pone.0148549)
Supplement: S1 Table — (XLSX) [file pone.0148549.s005.xlsx]

## Sheet: Hoja1
Sample ID	City of sample collection	Region	Country	Year of sample collection*	Year of HIV diagnosis	Gender	Transmission category†	Country of origin	Reference
P1774	San Sebastián	Basque Country	Spain	2007	2007	M	MSM	Spain
VA0027	Valladolid	Castilla y León	Spain	2011	2000	F	IDU	Spain
X1633	Vigo	Galicia	Spain	2004	1992	M	IDU	Portugal
X1753	Pontevedra	Galicia	Spain	2005	2005	M	IDU	Portugal
X3121	Vigo	Galicia	Spain	2011	2000	M	IDU	Spain
X3208	Lugo	Galicia	Spain	2011	2011	F	HT	Spain
X3785	Ourense	Galicia	Spain	2014	n.a.	M	n.a.	Spain
79	Lisbon		Portugal	1998-2000	n.a.	n.a.	n.a.	n.a.	4
227	Lisbon		Portugal	1998-2000	n.a.	n.a.	IDU	n.a.	4.11
410	Lisbon		Portugal	1998-2000	n.a.	n.a.	IDU	n.a	4.11
446	Lisbon		Portugal	1998-2000	n.a.	n.a.	IDU	n.a.	4.11
594	Lisbon		Portugal	1998-2000	n.a.	n.a.	IDU	n.a.	4.11
893	Lisbon		Portugal	1998-2000	n.a.	n.a.	IDU	n.a.	4.11
6068i	Lisbon		Portugal	1999-2000	n.a.	n.a.	IDU	n.a.	11
99302	n.a.	n.a.	Portugal	2003-2004	2003	n.a.	n.a.	n.a.	5
128223	n.a.	n.a.	Portugal	2003-2004	2003	n.a.	n.a.	n.a.	5
221259096565160	n.a.	n.a.	Portugal	2004	n.a.	n.a.	n.a.	n.a.
327577795316978	n.a.	n.a.	Portugal	2004	n.a.	n.a.	n.a.	n.a.
804179553018310	n.a.	n.a.	Portugal	2004	n.a.	n.a.	n.a.	n.a.
262520590603352	n.a.	n.a.	Portugal	2004	n.a.	n.a.	n.a.	n.a.
776506948518001	n.a.	n.a.	Portugal	2004	n.a.	n.a.	n.a.	n.a.
901442844386383	n.a.	n.a.	Portugal	2003	n.a.	n.a.	n.a.	n.a.
98PTHDcd82	n.a	n.a	Portugal	n.a.	n.a.	n.a.	n.a.	n.a.
BM22343	n.a.	n.a.	Portugal	2003-2004	2003	n.a.	n.a.	n.a.	5
envC10_2	n.a.	n.a.	Portugal	n.a.	n.a.	n.a.	MTCT	n.a.
envTM10-2	n.a	n.a.	Portugal	n.a.	n.a.	F	n.a.	n.a.
polTM6	n.a	n.a.	Portugal	n.a.	n.a.	F	n.a.	n.a.
PT125i	Lisbon		Portugal	1999-2000	n.a.	n.a.	IDU	n.a.	11
PT1175i	Lisbon		Portugal	1999-2000	n.a.	n.a.	IDU	n.a.	11
PT1759i	Lisbon		Portugal	1999-2000	n.a.	n.a.	IDU	n.a.	11
PT5192i	Lisbon		Portugal	1999-2000	n.a.	n.a.	IDU	n.a.	11
PT5291i	Lisbon		Portugal	1999-2000	n.a.	n.a.	IDU	n.a.	11
PT5767i	Lisbon		Portugal	1999-2000	n.a.	n.a.	IDU	n.a.	11
PTCBR_72	n.a	n.a.	Portugal	2004	n.a.	n.a.	n.a.	n.a.	11
PTCBR_130	n.a	n.a.	Portugal	2004	n.a.	n.a.	n.a.	n.a.
PTCBR_149	n.a.	n.a.	Portugal	2008	n.a.	n.a.	n.a.	n.a.
VLGC_PT_BG3	n.a.	n.a.	Portugal	n.a.	n.a.	n.a.	n.a.	n.a.
zmm78wlVKtEOkwe	n.a.	n.a.	Portugal	2004	n.a.	n.a.	n.a.	n.a.
9196_01	n.a.	n.a.	Germany	2001	n.a.	n.a.	IDU	n.a.	15
n.a.: not available
*for some samples, only year intervals of sample collection are known
†MSM: men who have sex with men; HT: heterosexual; IDU: injecting drug user; MTCT: mother to child transmission
